# Supplementary material
Source: publisher site journal article supplement (https://www.dovepress.com/article/492552)
Supplement: Supplementary file 1 [file get_supplementary_file.php]

**Supplemental Table 1A. Patient Demographics – Low Cylinder (≤2.00 D) Cohort**

| **Category** | **VM500 group** | **VM800 group** | **p-value** |
| --- | --- | --- | --- |
| Eyes | 55 | 49 | - |
| Age (years) mean ± SD (range) | 28.82 ± 5.35 | 27.78 ± 5.85 | - |
| Sex (M/F) % | 53 / 47 | 48 / 52 | - |
| Sphere (D) mean ± SD (range) | -3.56 ± 2.05 (-0.50 to -9.25) | -3.45 ± 1.90 (-0.50 to -10.50) | 0.942 |
| Cylinder (D) mean ± SD (range) | -1.72 ± 0.57 (-1.50 to -2.00) | -1.84 ± 0.22 (-1.50 to -2.00) | 0.168 |
| SEQ (D) mean ± SD (range) | -4.46 ± 2.08 (-1.37 to -10.25) | -4.40 ± 1.85 (-0.75 to -11.25) | 0.819 |
| CDVA (logMAR) mean ± SD (range) | -0.04 ± 0.05 (-0.20 to 0.0) | -0.04 ± 0.06 (-0.20 to 0.10) | 0.481 |

SD=standard deviation, SEQ=spherical equivalent, CDVA=corrected distance visual acuity

**Supplemental Table 1B. Patient Demographics – High Cylinder (>2.00 D) Cohort**

| **Category** | **VM500 group** | **VM800 group** | **p-value** |
| --- | --- | --- | --- |
| Eyes | 60 | 56 | - |
| Age (years) mean ± SD (range) | 30.28 ± 6.22 | 31.08 ± 6.48 | - |
| Sex (M/F) % | 57 / 43 | 52 / 48 | - |
| Sphere (D) mean ± SD (range) | -3.57 ± 2.19 (-0.50 to -8.00) | -3.64 ± 2.54 (-0.50 to -10.00) | 0.976 |
| Cylinder (D) mean ± SD (range) | -3.29 ± 0.82 (-2.25 to -5.00) | -3.04 ± 0.68 (-2.50 to -4.75) | 0.13 |
| SEQ (D) mean ± SD (range) | -5.16 ± 2.18 (-1.25 to -9.37) | -5.14 ± 2.50 (-1.87 to -12.00) | 0.732 |
| CDVA (logMAR) mean ± SD (range) | -0.03 ± 0.04 (-0.10 to 0.0) | -0.03 ± 0.04 (-0.10 to 0.0) | 0.819 |

SD=standard deviation, SEQ=spherical equivalent, CDVA=corrected distance visual acuity
